# Supplementary material for: Fitness Epistasis and Constraints on Adaptation in a Human Immunodeficiency Virus Type 1 Protein Region
Source: Oxford University Press journal article supplement (doi:10.1534/genetics.109.112458), 2010-02-16
Supplement: 112458_si.pdf [file 112458_si.pdf]

# GENETICS

Supporting Information

<http://www.genetics.org/cgi/content/full/genetics.109.112458/DC1>

## **Fitness Epistasis and Constraints on Adaptation in a Human Immunodeficiency Virus Type 1 Protein Region**

**Jack da Silva, Mia Coetzer, Rebecca Nedellec, Cristina Pastore  
and Donald E. Mosier**

Copyright © 2010 by the Genetics Society of America  
DOI: 10.1534/genetics.109.112458

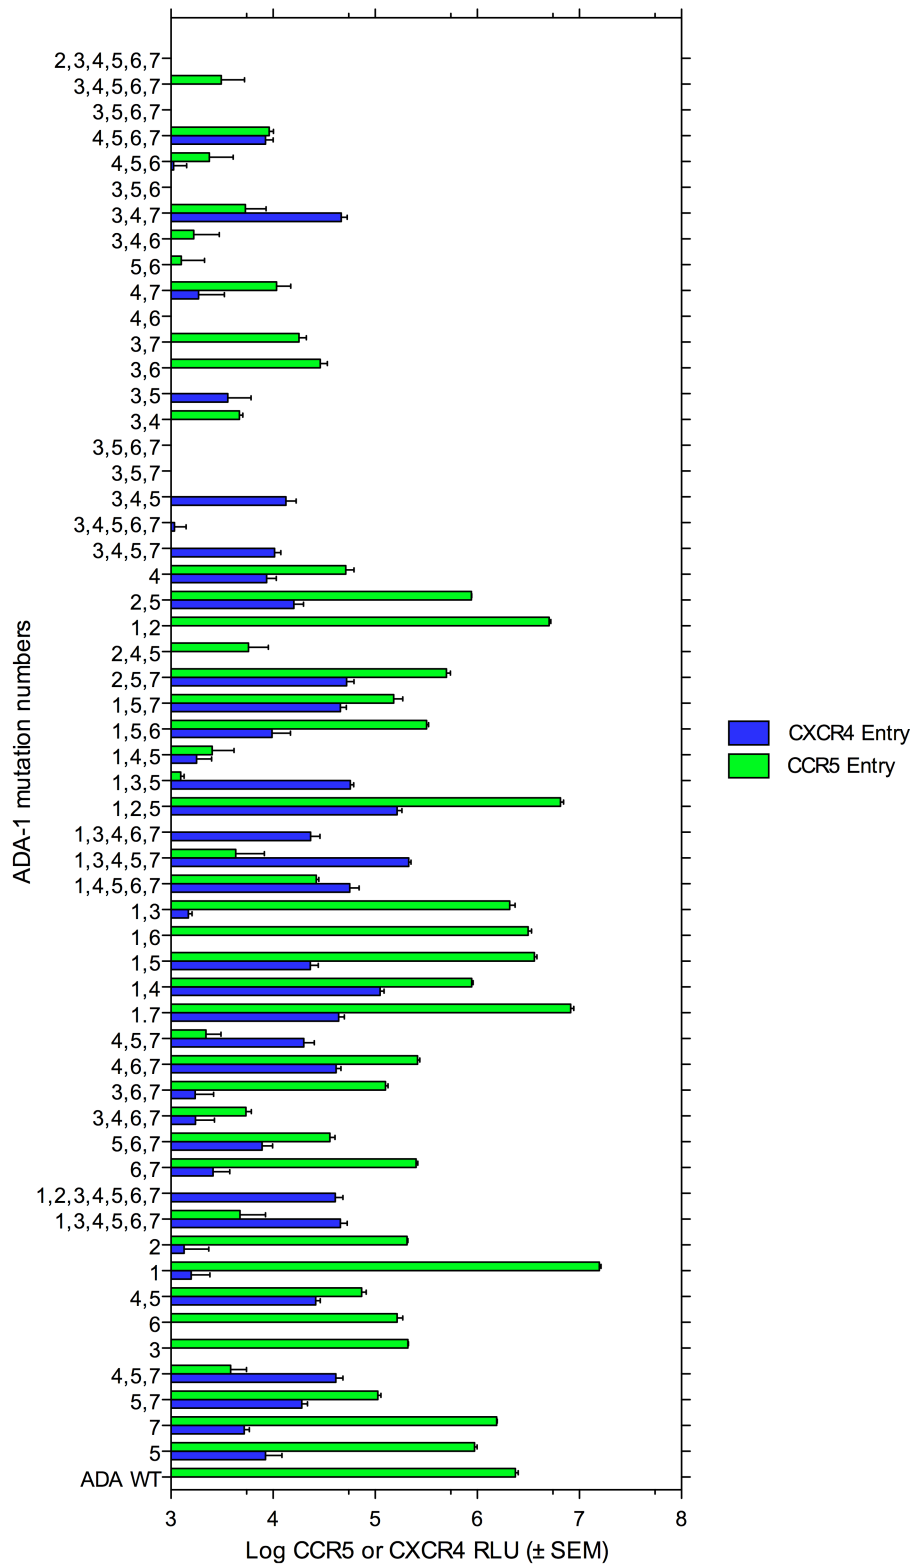

FIGURE S1.—The entry fitness of HIV-1 C2-V3 mutants on CCR5 and CXCR4 host cells in relative light units (RLU). Mutants were engineered with mutations observed for the ADA-1 CXCR4-adapted mutant on the ADA background. The method used to determine entry fitness is identical to that described in (PASTORE *et al.* 2006), with the exception that NP-2.CD4 target cells were used instead of U87.CD4 cells. Briefly, equivalent p24 levels of pseudotyped virus particles were added to each target cell line, and the luciferase activity of triplicate wells determined 48 hr. later. Experiments were repeated three times for all mutations that scored above background ( $\sim 1000$  RLU).

PASTORE, C., R. NEDELEC, A. RAMOS, S. PONTOW, L. RATNER *et al.*, 2006 Human immunodeficiency virus type 1 coreceptor switching: V1/V2 gain-of-fitness mutations compensate for V3 loss-of-fitness mutations. *Journal of Virology* **80**: 750-758.

**TABLE S1****Means and variances in fitness and epistatic deviation for assays on CCR5 and CXCR4 target cells**

| Mutations | CCR5       |        |                 |               |                           |      |         |                |                            |      | CXCR4    |        |                 |               |                           |      |        |                |                            |      |  |
|-----------|------------|--------|-----------------|---------------|---------------------------|------|---------|----------------|----------------------------|------|----------|--------|-----------------|---------------|---------------------------|------|--------|----------------|----------------------------|------|--|
|           | $W$        | $w$    | $\text{Var}(w)$ | $\varepsilon$ | $\text{Var}(\varepsilon)$ | Sig. | E       | $\varepsilon'$ | $\text{Var}(\varepsilon')$ | Sig. | $W$      | $w$    | $\text{Var}(w)$ | $\varepsilon$ | $\text{Var}(\varepsilon)$ | Sig. | E      | $\varepsilon'$ | $\text{Var}(\varepsilon')$ | Sig. |  |
| wt        | 2357403.7  | 1.0000 | 0.0147          |               |                           |      |         |                |                            |      | 441.1    | 0.0109 | 0.0000          |               |                           |      |        |                |                            |      |  |
| 1         | 15717078.9 | 6.6671 | 0.1926          |               |                           |      |         |                |                            |      | 1584.3   | 0.0390 | 0.0012          |               |                           |      |        |                |                            |      |  |
| 2         | 205870.3   | 0.0873 | 0.0000          |               |                           |      |         |                |                            |      | 1346.8   | 0.0331 | 0.0018          |               |                           |      |        |                |                            |      |  |
| 3         | 209335.1   | 0.0888 | 0.0000          |               |                           |      |         |                |                            |      | 232.0    | 0.0057 | 0.0000          |               |                           |      |        |                |                            |      |  |
| 4         | 51631.0    | 0.0219 | 0.0001          |               |                           |      |         |                |                            |      | 8656.0   | 0.2129 | 0.0082          |               |                           |      |        |                |                            |      |  |
| 5         | 942373.0   | 0.3998 | 0.0015          |               |                           |      |         |                |                            |      | 8420.5   | 0.2071 | 0.0267          |               |                           |      |        |                |                            |      |  |
| 6         | 163853.1   | 0.0695 | 0.0003          |               |                           |      |         |                |                            |      | 893.1    | 0.0220 | 0.0002          |               |                           |      |        |                |                            |      |  |
| 7         | 1548272.5  | 0.6568 | 0.0002          |               |                           |      |         |                |                            |      | 5216.2   | 0.1283 | 0.0007          |               |                           |      |        |                |                            |      |  |
| 12        | 5055976.9  | 2.1447 | 0.0202          | 1.5625        | 0.0219                    | *    | 0.5663  |                |                            |      | 841.4    | 0.0207 | 0.0003          | 0.0194        | 0.0003                    |      | 1.2050 |                |                            |      |  |
| 13        | 2078231.0  | 0.8816 | 0.0416          | 0.2895        | 0.0433                    |      | 0.1729  |                |                            |      | 1478.8   | 0.0364 | 0.0000          | 0.0362        | 0.0000                    | *    | 2.2137 |                |                            |      |  |
| 14        | 880760.1   | 0.3736 | 0.0005          | 0.2276        | 0.0032                    | *    | 0.4080  |                |                            |      | 111577.6 | 2.7446 | 0.2023          | 2.7363        | 0.2024                    | *    | 2.5195 |                |                            |      |  |
| 15        | 3625942.7  | 1.5381 | 0.0258          | -1.1271       | 0.1252                    | *    | -0.2387 |                |                            |      | 23136.3  | 0.5691 | 0.0398          | 0.5610        | 0.0399                    |      | 1.8482 |                |                            |      |  |
| 16        | 3161239.0  | 1.3410 | 0.0301          | 0.8776        | 0.0436                    | *    | 0.4615  |                |                            |      | 717.9    | 0.0177 | 0.0001          | 0.0168        | 0.0001                    |      | 1.3144 |                |                            |      |  |
| 17        | 8238111.1  | 3.4946 | 0.1935          | -0.8842       | 0.2846                    |      | -0.0980 |                |                            |      | 44040.8  | 1.0833 | 0.0625          | 1.0783        | 0.0625                    | *    | 2.3358 |                |                            |      |  |
| 25        | 879624.7   | 0.3731 | 0.0000          | 0.3382        | 0.0000                    | *    | 1.0289  |                |                            |      | 15978.0  | 0.3930 | 0.0279          | 0.3862        | 0.0280                    |      | 1.7580 |                |                            |      |  |
| 34        | 4677.9     | 0.0020 | 0.0000          | 0.0000        | 0.0000                    |      | 0.0087  |                |                            |      | 356.4    | 0.0088 | 0.0000          | 0.0076        | 0.0000                    | *    | 0.8582 |                |                            |      |  |
| 35        | 480.4      | 0.0002 | 0.0000          | -0.0353       | 0.0000                    | *    | -2.2410 |                |                            |      | 3612.0   | 0.0888 | 0.0112          | 0.0877        | 0.0112                    |      | 1.8760 |                |                            |      |  |
| 36        | 28996.4    | 0.0123 | 0.0000          | 0.0061        | 0.0000                    |      | 0.2995  |                |                            |      | 646.2    | 0.0159 | 0.0000          | 0.0158        | 0.0000                    | *    | 2.1031 |                |                            |      |  |
| 37        | 17917.1    | 0.0076 | 0.0000          | -0.0507       | 0.0000                    | *    | -0.8850 |                |                            |      | 329.9    | 0.0081 | 0.0000          | 0.0074        | 0.0000                    | *    | 1.0446 |                |                            |      |  |
| 45        | 73844.4    | 0.0313 | 0.0000          | 0.0226        | 0.0000                    | *    | 0.5536  |                |                            |      | 26176.8  | 0.6439 | 0.0138          | 0.5998        | 0.0156                    | *    | 1.1644 |                |                            |      |  |
| 46        | 323.9      | 0.0001 | 0.0000          | -0.0014       | 0.0000                    |      | -1.0445 |                |                            |      | 351.2    | 0.0086 | 0.0000          | 0.0040        | 0.0000                    |      | 0.2664 |                |                            |      |  |
| 47        | 10832.0    | 0.0046 | 0.0000          | -0.0098       | 0.0000                    |      | -0.4956 |                |                            |      | 1867.2   | 0.0459 | 0.0040          | 0.0186        | 0.0041                    |      | 0.2256 |                |                            |      |  |
| 56        | 1265.5     | 0.0005 | 0.0000          | -0.0272       | 0.0001                    | *    | -1.7140 |                |                            |      | 328.3    | 0.0081 | 0.0000          | 0.0035        | 0.0000                    |      | 0.2491 |                |                            |      |  |
| 57        | 106531.5   | 0.0452 | 0.0000          | -0.2174       | 0.0007                    | *    | -0.7642 |                |                            |      | 19148.7  | 0.4710 | 0.0117          | 0.4444        | 0.0122                    | *    | 1.2485 |                |                            |      |  |

|       |           |        |        |         |        |   |         |         |        |   |          |        |        |        |        |   |        |         |        |   |
|-------|-----------|--------|--------|---------|--------|---|---------|---------|--------|---|----------|--------|--------|--------|--------|---|--------|---------|--------|---|
| 67    | 252541.4  | 0.1071 | 0.0000 | 0.0615  | 0.0002 | * | 0.3705  |         |        |   | 2583.2   | 0.0635 | 0.0026 | 0.0607 | 0.0026 |   | 1.3530 |         |        |   |
| 125   | 6550730.2 | 2.7788 | 0.1077 | 2.5460  | 0.1085 | * | 1.0770  | 1.7724  | 0.2556 | * | 164389.1 | 4.0436 | 0.5978 | 4.0434 | 0.5978 | * | 4.1796 | 3.0768  | 0.6661 | * |
| 135   | 1244.4    | 0.0005 | 0.0000 | -0.2361 | 0.0008 | * | -2.6516 | 0.6367  | 0.1693 |   | 57010.6  | 1.4023 | 0.0416 | 1.4023 | 0.0416 | * | 4.4835 | 0.7174  | 0.0927 |   |
| 145   | 2542.6    | 0.0011 | 0.0000 | -0.0573 | 0.0005 |   | -1.7334 | 0.8196  | 0.1289 |   | 1781.2   | 0.0438 | 0.0010 | 0.0421 | 0.0010 |   | 1.4064 | -3.8550 | 0.2588 | * |
| 156   | 320045.8  | 0.1358 | 0.0001 | -0.0495 | 0.0026 |   | -0.1350 | 0.2273  | 0.1715 |   | 9794.4   | 0.2409 | 0.0458 | 0.2407 | 0.0458 |   | 3.1331 | -0.3406 | 0.0858 |   |
| 157   | 152494.3  | 0.0647 | 0.0006 | -1.6857 | 0.0448 | * | -1.4323 | 0.5429  | 0.4553 |   | 45575.9  | 1.1211 | 0.0826 | 1.1200 | 0.0826 | * | 3.0344 | -0.9638 | 0.1972 |   |
| 245   | 5752.6    | 0.0024 | 0.0000 | 0.0017  | 0.0000 |   | 0.5040  |         |        |   | 883.5    | 0.0217 | 0.0004 | 0.0203 | 0.0004 |   | 1.1724 |         |        |   |
| 257   | 499694.0  | 0.2120 | 0.0011 | 0.1890  | 0.0011 | * | 0.9659  |         |        |   | 52481.4  | 1.2909 | 0.1730 | 1.2901 | 0.1730 | * | 3.1662 |         |        |   |
| 345   | 449.3     | 0.0002 | 0.0000 | -0.0006 | 0.0000 |   | -0.6106 | 0.0121  | 0.0001 |   | 13367.1  | 0.3288 | 0.0220 | 0.3286 | 0.0220 |   | 3.1161 | -0.3665 | 0.0487 |   |
| 346   | 1677.2    | 0.0007 | 0.0000 | 0.0006  | 0.0000 |   | 0.7212  | -0.0042 | 0.0000 |   | 321.7    | 0.0079 | 0.0000 | 0.0079 | 0.0000 | * | 2.4719 | -0.0194 | 0.0000 | * |
| 347   | 5376.8    | 0.0023 | 0.0000 | 0.0010  | 0.0000 |   | 0.2518  | 0.0615  | 0.0000 | * | 46615.1  | 1.1466 | 0.0777 | 1.1465 | 0.0777 | * | 3.8666 | 1.1129  | 0.0819 | * |
| 356   | 322.8     | 0.0001 | 0.0000 | -0.0023 | 0.0000 | * | -1.2557 | 0.0541  | 0.0001 | * | 310.8    | 0.0076 | 0.0000 | 0.0076 | 0.0000 | * | 2.4690 | -0.0993 | 0.0112 |   |
| 357   | 353.0     | 0.0001 | 0.0000 | -0.0232 | 0.0000 | * | -2.1923 | 0.2802  | 0.0008 | * | 366.5    | 0.0090 | 0.0000 | 0.0089 | 0.0000 | * | 1.7741 | -0.5306 | 0.0234 | * |
| 367   | 126438.6  | 0.0536 | 0.0000 | 0.0496  | 0.0000 | * | 1.1216  | 0.0327  | 0.0002 |   | 1733.2   | 0.0426 | 0.0014 | 0.0426 | 0.0014 |   | 3.4233 | -0.0413 | 0.0040 |   |
| 456   | 2382.2    | 0.0010 | 0.0000 | 0.0004  | 0.0000 |   | 0.2203  | 0.0065  | 0.0001 |   | 1064.9   | 0.0262 | 0.0002 | 0.0252 | 0.0002 |   | 1.4320 | -0.5821 | 0.0159 | * |
| 457   | 3851.5    | 0.0016 | 0.0000 | -0.0041 | 0.0000 |   | -0.5465 | 0.2005  | 0.0008 | * | 41248.0  | 1.0146 | 0.0895 | 1.0090 | 0.0896 | * | 2.2536 | -0.0539 | 0.1215 |   |
| 457   | 2198.6    | 0.0009 | 0.0000 | -0.0048 | 0.0000 |   | -0.7900 | 0.1998  | 0.0008 | * | 20073.9  | 0.4938 | 0.0494 | 0.4881 | 0.0495 |   | 1.9408 | -0.5747 | 0.0814 |   |
| 467   | 260575.8  | 0.1105 | 0.0001 | 0.1095  | 0.0001 | * | 2.0436  | 0.0592  | 0.0003 | * | 41540.0  | 1.0218 | 0.0407 | 1.0212 | 0.0407 | * | 3.2311 | 0.9379  | 0.0475 | * |
| 567   | 36089.6   | 0.0153 | 0.0000 | -0.0029 | 0.0000 |   | -0.0763 | 0.1802  | 0.0010 | * | 7841.0   | 0.1929 | 0.0077 | 0.1923 | 0.0077 |   | 2.5190 | -0.3164 | 0.0225 |   |
| 3456  | 3115.5    | 0.0013 | 0.0000 | 0.0013  | 0.0000 |   | 1.3884  | -0.0320 | 0.0004 |   | 320.9    | 0.0079 | 0.0000 | 0.0079 | 0.0000 | * | 3.1546 | 0.3569  | 0.1027 |   |
| 3457  | 466.8     | 0.0002 | 0.0000 | -0.0003 | 0.0000 |   | -0.4114 | -0.2636 | 0.0025 | * | 10389.4  | 0.2556 | 0.0044 | 0.2555 | 0.0044 | * | 3.8984 | -0.8115 | 0.3030 |   |
| 3467  | 5438.3    | 0.0023 | 0.0000 | 0.0022  | 0.0000 | * | 1.4147  | -0.1527 | 0.0008 | * | 1737.7   | 0.0427 | 0.0016 | 0.0427 | 0.0016 |   | 4.0962 | -2.0614 | 0.1417 | * |
| 3567  | 436.1     | 0.0002 | 0.0000 | -0.0014 | 0.0000 | * | -0.9425 | -0.2856 | 0.0030 | * | 359.3    | 0.0088 | 0.0000 | 0.0088 | 0.0000 | * | 3.4237 | 0.3770  | 0.0872 |   |
| 3567  | 334.0     | 0.0001 | 0.0000 | -0.0015 | 0.0000 | * | -1.0583 | -0.2856 | 0.0030 | * | 333.0    | 0.0082 | 0.0000 | 0.0082 | 0.0000 | * | 3.3907 | 0.3763  | 0.0872 |   |
| 4567  | 9145.7    | 0.0039 | 0.0000 | 0.0035  | 0.0000 | * | 0.9871  | -0.2711 | 0.0032 | * | 8461.9   | 0.2081 | 0.0046 | 0.2080 | 0.0046 | * | 3.2239 | -0.6482 | 0.2265 |   |
| 13457 | 4311.6    | 0.0018 | 0.0000 | -0.0016 | 0.0000 |   | -0.2698 |         |        |   | 213643.4 | 5.2552 | 0.2281 | 5.2552 | 0.2281 | * | 6.6208 |         |        |   |
| 13467 | 559.1     | 0.0002 | 0.0000 | -0.0004 | 0.0000 |   | -0.3972 |         |        |   | 23371.1  | 0.5749 | 0.0547 | 0.5749 | 0.0547 |   | 6.6342 |         |        |   |
| 14567 | 26450.9   | 0.0112 | 0.0000 | 0.0086  | 0.0000 | * | 0.6244  |         |        |   | 56417.9  | 1.3878 | 0.3193 | 1.3878 | 0.3193 |   | 5.4571 |         |        |   |
| 34567 | 386.0     | 0.0002 | 0.0000 | 0.0001  | 0.0000 | * | 0.6640  | 0.3745  | 0.0143 | * | 1084.1   | 0.0267 | 0.0002 | 0.0267 | 0.0002 |   | 4.5751 | 1.7838  | 1.2635 |   |

|         |        |        |        |        |        |   |        |         |        |        |        |        |   |        |
|---------|--------|--------|--------|--------|--------|---|--------|---------|--------|--------|--------|--------|---|--------|
| 134567  | 4734.1 | 0.0020 | 0.0000 | 0.0018 | 0.0000 |   | 0.9288 | 45549.8 | 1.1204 | 0.1099 | 1.1204 | 0.1099 | * | 7.6078 |
| 234567  | 310.2  | 0.0001 | 0.0000 | 0.0001 | 0.0000 | * | 1.6279 | 340.4   | 0.0084 | 0.0000 | 0.0084 | 0.0000 | * | 5.5518 |
| 1234567 | 423.2  | 0.0002 | 0.0000 | 0.0002 | 0.0000 | * | 0.9389 | 40653.7 | 1.0000 | 0.1050 | 1.0000 | 0.1050 | * | 9.0382 |

---

$W$ , absolute fitness;  $w$ , relative fitness; Var, variance;  $\epsilon$ , overall epistatic deviation;  $\epsilon'$ , net epistatic deviation; E, epistasis magnitude; Sig., significant epistatic deviation at an experimentwise type-1 error rate of  $\alpha' = 0.05$ .
