# Supplementary material for: Fitness Epistasis and Constraints on Adaptation in a Human Immunodeficiency Virus Type 1 Protein Region
Source: Oxford University Press journal article supplement (doi:10.1534/genetics.109.112458), 2010-02-16
Supplement: figures1.pdf [file figures1.pdf]

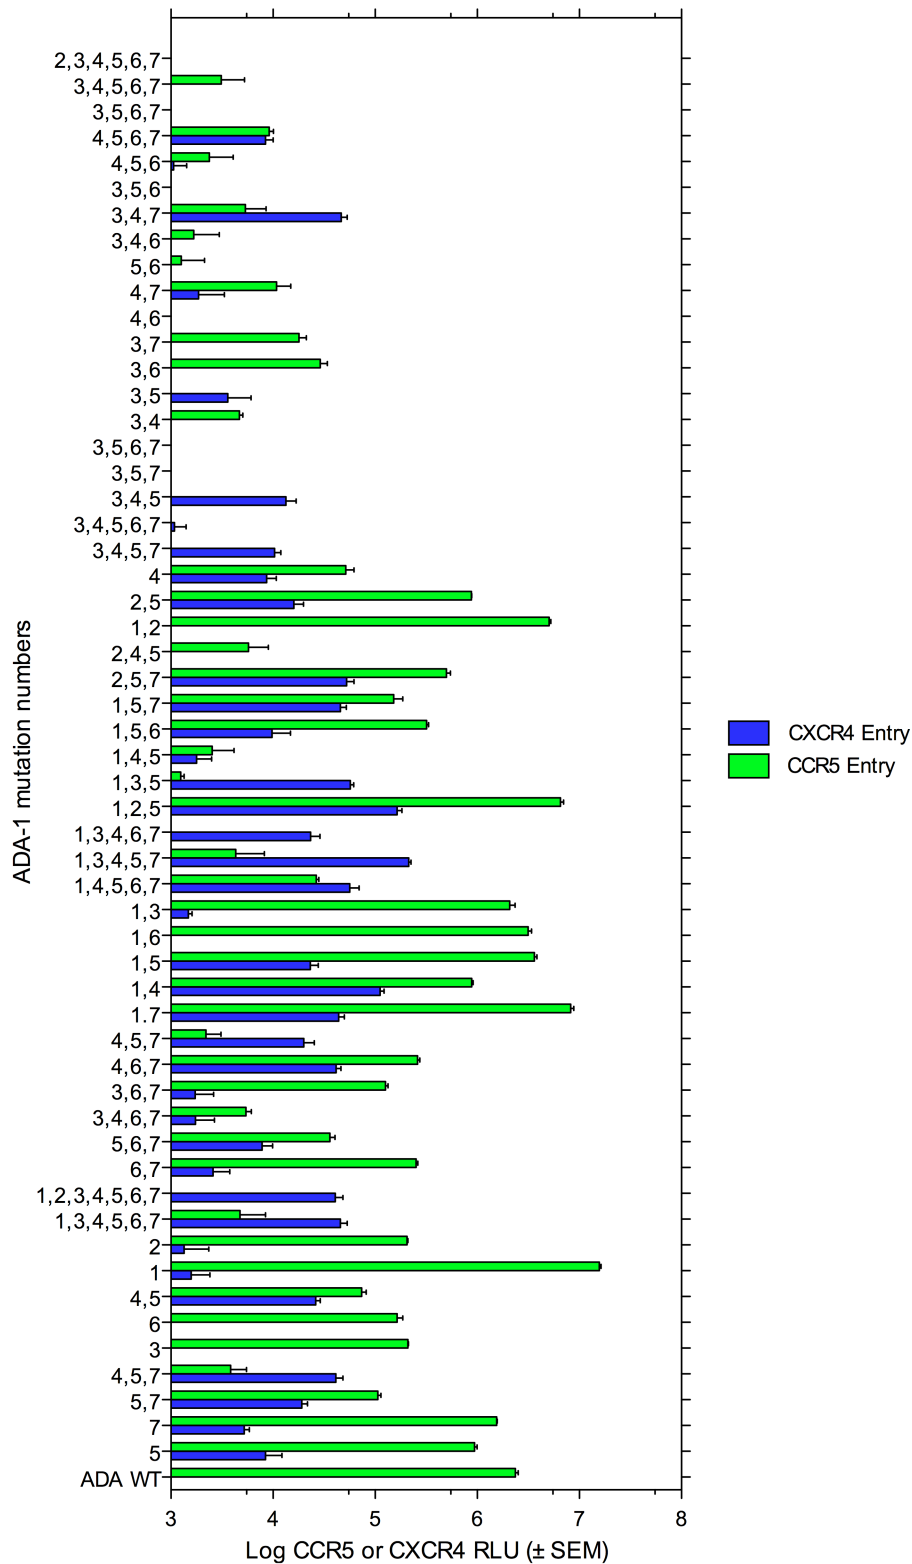

FIGURE S1.—The entry fitness of HIV-1 C2-V3 mutants on CCR5 and CXCR4 host cells in relative light units (RLU). Mutants were engineered with mutations observed for the ADA-1 CXCR4-adapted mutant on the ADA background. The method used to determine entry fitness is identical to that described in (PASTORE *et al.* 2006), with the exception that NP-2.CD4 target cells were used instead of U87.CD4 cells. Briefly, equivalent p24 levels of pseudotyped virus particles were added to each target cell line, and the luciferase activity of triplicate wells determined 48 hr. later. Experiments were repeated three times for all mutations that scored above background ( $\sim 1000$  RLU).

PASTORE, C., R. NEDELEC, A. RAMOS, S. PONTOW, L. RATNER *et al.*, 2006 Human immunodeficiency virus type 1 coreceptor switching: V1/V2 gain-of-fitness mutations compensate for V3 loss-of-fitness mutations. *Journal of Virology* **80**: 750-758.
